# Supplementary material
Source: publisher figshare collection journal article supplement (https://sage.figshare.com/ndownloader/files/15433364)
Supplement: Supplementary file 1 [file 15433364]

**Table S1: Diagnoses and Procedures for False Positives and False Negative Cases**

| <b>Miscategorization</b> | <b>Diagnoses</b>                                                                                                                                                                                                                                                                                     | <b>Procedures</b>                                                                                                                                                                                                       |
|--------------------------|------------------------------------------------------------------------------------------------------------------------------------------------------------------------------------------------------------------------------------------------------------------------------------------------------|-------------------------------------------------------------------------------------------------------------------------------------------------------------------------------------------------------------------------|
| False Positive           | <ul style="list-style-type: none"> <li>Moderate persistent asthma with status asthmaticus</li> </ul>                                                                                                                                                                                                 |                                                                                                                                                                                                                         |
| False Positive           | <ul style="list-style-type: none"> <li>Acute bronchiolitis, unspecified</li> </ul>                                                                                                                                                                                                                   |                                                                                                                                                                                                                         |
| False Positive           | <ul style="list-style-type: none"> <li>Adult T-cell lymphoma/leukemia (HTLV-1-assoc), in relapse</li> <li>Autistic disorder</li> <li>Epilepsy, unspecified, not intractable, without status epilepticus</li> <li>Blindness, left eye, normal vision right eye</li> <li>Edema, unspecified</li> </ul> |                                                                                                                                                                                                                         |
| False Positive           | <ul style="list-style-type: none"> <li>Perinatal digestive system disorder, unspecified</li> <li>Constipation, unspecified</li> <li>Abdominal distension (gaseous)</li> <li>Other congenital anemias, not elsewhere classified</li> </ul>                                                            | <ul style="list-style-type: none"> <li>Digital x-ray abdomen 1 view</li> </ul>                                                                                                                                          |
| False Positive           | <ul style="list-style-type: none"> <li>Constipation, unspecified</li> <li>Unspecified abdominal pain</li> <li>Urticaria, unspecified</li> </ul>                                                                                                                                                      | <ul style="list-style-type: none"> <li>Ultrasound images 2<sup>nd</sup> interpretation</li> <li>In and out catheter</li> <li>Computed Tomography abdomen/pelvis outside images 2<sup>nd</sup> interpretation</li> </ul> |
| False Positive           | <ul style="list-style-type: none"> <li>Vomiting, unspecified</li> <li>Dehydration</li> <li>Colostomy status</li> </ul>                                                                                                                                                                               | <ul style="list-style-type: none"> <li>Digital x-ray pelvis outside images 2<sup>nd</sup> interpretation</li> </ul>                                                                                                     |
| False Positive           | <ul style="list-style-type: none"> <li>Viral infection, unspecified</li> <li>Neutropenia, unspecified</li> <li>Anal fissure, unspecified</li> <li>Melena</li> <li>Rash and other nonspecific skin eruption</li> <li>Fever presenting with conditions classified elsewhere</li> </ul>                 | <ul style="list-style-type: none"> <li>Digital x-ray abdomen outside images 2<sup>nd</sup> interpretation</li> </ul>                                                                                                    |
| False Positive           | <ul style="list-style-type: none"> <li>Unspecified asthma with (acute) exacerbation</li> </ul>                                                                                                                                                                                                       | <ul style="list-style-type: none"> <li>Digital x-ray chest outside images 2<sup>nd</sup> interpretation</li> </ul>                                                                                                      |
| False Positive           | <ul style="list-style-type: none"> <li>Acute bronchiolitis, unspecified</li> <li>Unspecified asthma, uncomplicated</li> <li>Acute upper respiratory infection, unspecified</li> <li>Viral infection, unspecified</li> <li>Epilepsy, unspecified, not</li> </ul>                                      | <ul style="list-style-type: none"> <li>Digital x-ray chest outside images 2<sup>nd</sup> interpretation</li> <li>Metered dose inhaler</li> </ul>                                                                        |

|                |                                                                                                                                                                                                                                                             |                                                                                                                                                                            |
|----------------|-------------------------------------------------------------------------------------------------------------------------------------------------------------------------------------------------------------------------------------------------------------|----------------------------------------------------------------------------------------------------------------------------------------------------------------------------|
|                | intractable, without status epilepticus                                                                                                                                                                                                                     |                                                                                                                                                                            |
| False Positive | <ul style="list-style-type: none"> <li>• Unspecified asthma with status asthmaticus</li> </ul>                                                                                                                                                              | <ul style="list-style-type: none"> <li>• Digital x-ray chest 1 view</li> </ul>                                                                                             |
| False Positive | <ul style="list-style-type: none"> <li>• Unspecified asthma with (acute) exacerbation</li> <li>• Acute upper respiratory infection, unspecified</li> </ul>                                                                                                  |                                                                                                                                                                            |
| False Positive | <ul style="list-style-type: none"> <li>• Nonspecific mesenteric lymphadenitis</li> </ul>                                                                                                                                                                    | <ul style="list-style-type: none"> <li>• Computed Tomography abdomen/pelvis outside images 2<sup>nd</sup> interpretation</li> </ul>                                        |
| False Positive | <ul style="list-style-type: none"> <li>• Mild intermittent asthma with status asthmaticus</li> <li>• Acute upper respiratory infection, unspecified</li> <li>• Tachycardia, unspecified</li> </ul>                                                          |                                                                                                                                                                            |
| False Positive | <ul style="list-style-type: none"> <li>• Acute obstructive laryngitis [croup]</li> <li>• Bradycardia, unspecified</li> </ul>                                                                                                                                |                                                                                                                                                                            |
| False Positive | <ul style="list-style-type: none"> <li>• Unspecified asthma with (acute) exacerbation</li> </ul>                                                                                                                                                            |                                                                                                                                                                            |
| False Positive | <ul style="list-style-type: none"> <li>• Mild persistent asthma with (acute) exacerbation</li> <li>• Anemia due to glucose-6-phosphate dehydrogenase deficiency</li> <li>• Contact with and exposure to environ tobacco smoke (acute) (chronic)</li> </ul>  |                                                                                                                                                                            |
| False Positive | <ul style="list-style-type: none"> <li>• Abnormal levels of other serum enzymes</li> <li>• Dehydration</li> <li>• Viral intestinal infection, unspecified</li> <li>• Congenital ichthyosis, unspecified</li> <li>• Presence of cardiac pacemaker</li> </ul> |                                                                                                                                                                            |
| False Negative | <ul style="list-style-type: none"> <li>• Cardiomegaly</li> </ul>                                                                                                                                                                                            | <ul style="list-style-type: none"> <li>• Pediatric echocardiogram complete</li> <li>• Electrocardiogram with rhythm strip</li> <li>• Digital x-ray chest 1 view</li> </ul> |
| False Negative | <ul style="list-style-type: none"> <li>• Toxic effect of unspecified corrosive substance, accidental, initial</li> <li>• Otitis media, unspecified, unspecified ear</li> <li>• Unspecified place in single-family (private) house as place</li> </ul>       |                                                                                                                                                                            |
| False Negative | <ul style="list-style-type: none"> <li>• Unspecified convulsions</li> </ul>                                                                                                                                                                                 | <ul style="list-style-type: none"> <li>• Magnetic Resonance Imaging</li> </ul>                                                                                             |

|                |                                                                                                                                                                                     |                                                                                                                                                                                                                                                                                              |
|----------------|-------------------------------------------------------------------------------------------------------------------------------------------------------------------------------------|----------------------------------------------------------------------------------------------------------------------------------------------------------------------------------------------------------------------------------------------------------------------------------------------|
|                | <ul style="list-style-type: none"> <li>• Developmental disorder of speech and language, unspecified</li> </ul>                                                                      | (MRI) brain with / without contrast <ul style="list-style-type: none"> <li>• Routine Electroencephalogram</li> <li>• Measure of Central Nervous Electr Activity, Extern Approach</li> <li>• Magnetic Resonance Imaging (MRI) of Brain</li> </ul>                                             |
| False Negative | <ul style="list-style-type: none"> <li>• Other iron deficiency anemias</li> </ul>                                                                                                   | <ul style="list-style-type: none"> <li>• Type and screen</li> </ul>                                                                                                                                                                                                                          |
| False Negative | <ul style="list-style-type: none"> <li>• Fever, unspecified</li> <li>• Mucocutaneous lymph node syndrome [Kawasaki]</li> </ul>                                                      |                                                                                                                                                                                                                                                                                              |
| False Negative | <ul style="list-style-type: none"> <li>• Laceration with foreign body of scalp, initial encounter</li> <li>• Assault by unspecified firearm discharge, initial encounter</li> </ul> | <ul style="list-style-type: none"> <li>• Type and screen</li> <li>• Computed Tomography head outside images 2<sup>nd</sup> interpretation</li> <li>• Digital x-ray skull under 4 views</li> <li>• Digital x-ray chest 1 view</li> <li>• Computed Tomography head without contrast</li> </ul> |

Patient transfer was a false positive if the potentially avoidable transfer (PAT) metric categorized the case as PAT when the physicians' medical record review (gold standard) categorized the case as not PAT. Patient transfer was a false negative if the PAT metric categorized the case as not PAT when the physicians' medical record review (gold standard) categorized the case as PAT.
